# Supplementary material
Source: publisher site journal article supplement (https://www.dovepress.com/article/392273)
Supplement: Supplementary file 1 [file get_supplementary_file.php]

Supporting file. Search string. Embase and Medline.

| 1. | multiple sclerosis.mp. or multiple sclerosis/ |
| --- | --- |
| 2. | disseminated sclerosis.mp. |
| 3. | 1 or 2 |
| 4. | pregnancy/ or pregnancy.mp. |
| 5. | maternal.mp. |
| 6. | mothers.mp. |
| 7. | gravidity.mp. |
| 8. | birth.mp. or birth/ |
| 9. | parturity.mp. |
| 10. | 4 or 5 or 6 or 7 or 8 or 9 |
| 11. | 3 and 10 |
| 12. | children.mp. or child/ |
| 13. | child/ or child.mp. |
| 14. | offspring.mp. or progeny/ |
| 15. | infant.mp. or infant/ |
| 16. | adult children.mp. or adult child/ |
| 17. | (child adj3 impaired adj3 parent*).mp. |
| 18. | 12 or 13 or 14 or 15 or 16 or 17 |
| 19. | 11 and 18 |

| 1. | Multiple sclerosis.mp. or multiple sclerosis/ |
| --- | --- |
| 2. | disseminated sclerosis.mp. |
| 3. | 1 or 2 |
| 4. | pregnancy/ or pregnancy.mp. |
| 5. | maternal.mp. |
| 6. | mothers.mp. or mother/ |
| 7. | gravidity.mp. or pregnancy/ |
| 8. | birth.mp. or birth/ |
| 9. | parturition.mp. or birth/ |
| 10. | 4 or 5 or 6 or 7 or 8 or 9 |
| 11. | 3 and 10 |
| 12. | neonatal.mp. |
| 13. | infant/ or preterm.mp. |
| 14. | child/ or adolescent/ or childhood/ or children*.mp. |
| 15. | child/ or child.mp. |
| 16. | offspring.mp. or progeny/ |
| 17. | infant.mp. or infant/ |
| 18. | progeny.mp. or progeny/ |
| 19. | small for date infant/ or SGA.mp. |
| 20. | (small adj3 gestational adj3 age).mp. |
| 21. | (congenital adj3 malformation*).mp. |
| 22. | congenital.mp. |
| 23. | (congenital adj3 abnormali*).mp. |
| 24. | stillbirth.mp. or stillbirth/ |
| 25. | 12 or 13 or 14 or 15 or 16 or 17 or 18 or 19 or 20 or 21 or 22 or 23 or 24 |
| 26. | 11 and 25 |
